# Supplementary material
Source: PubMed Central journal article supplement (PMC5549555)
Supplement: NIHMS890153-supplement-1.pdf [file NIHMS890153-supplement-1.pdf]

**Combining Local Immunotoxins Targeting Mesothelin with CTLA-4 Blockade  
Synergistically Eradicates Murine Cancer by Promoting Anti-Cancer Immunity**

Yasmin Leshem, James O'Brien, Xiufen Liu, Tapan K. Bera, Masaki Terabe, Jay A Berzofsky,  
Birgit Bossenmaier, Gerhard Niederfellner, Chin-Hsien Tai, Yoram Reiter, and Ira Pastan

**SUPPLEMENTARY INFORMATION**

## Supplementary figure S1

**A**

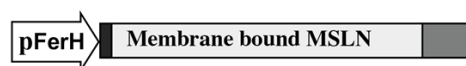

**B**

**METDTLLLVLLLWVPGSTGEVEKTACPSGKKAREIDESLIFYKKWELEACVDAALLATQMDRVNAIP**  
*FTYEQLDVLKHKLDELYPQGYPEsvIQHLGYLFLKMSPEDIRKWNVTSLETLKALLEVNKGHEMSPQV*  
*ATLIDRFVKGRGQLDKDTLDTLTAfYPGYLCSLSPEELSSVPPSSIWAVRPQDLDTCDPRQLDVLYPKA*  
*RLAFQNMNGSEYFVKIQSFLGGAPTEdlKALSQQNVSMdlATfMklRtdAVLPLtVAEVQKLLGPHVE*  
GLKAEERHRPVRDWILRQRQDDDLTLGLGLQGGIPNGLCFAAIALVIFFLIGFMSGYLGYG

**Bold letters:** Murine IgK leader domain.

*Italics:* Membrane bound human mesothelin domain.

Underlined: Murine transferrin receptor transmembrane domain.

**C**

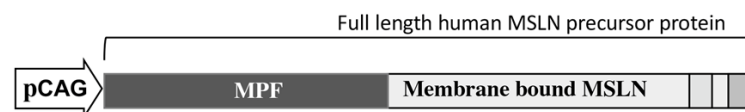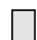

TACE cleavage sequence

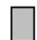

GPI anchor

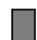

Transmembrane domain of mouse transferrin receptor

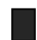

Mouse Ig kappa membrane targeting signal

**Description of DNA constructs.** **A-B.** Diagram of the DNA construct used to generate 66C14-M cell line (A) and its sequence (B). **C.** Diagram of the DNA construct used to generate human mesothelin transgenic mice.

**Supplementary figure S2**

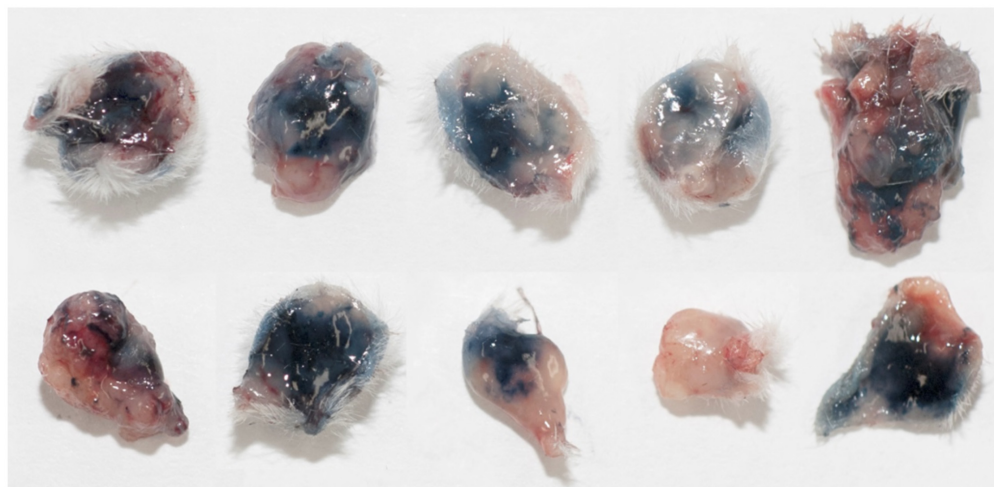

**Distribution of intra-tumoral injected trypan blue.** Five 66C14 tumors (72 to 117mm<sup>3</sup>) were injected with 30  $\mu$ l trypan blue . One hour after the injection, tumors were harvested, cut to half and photographed.

### Supplementary figure S3

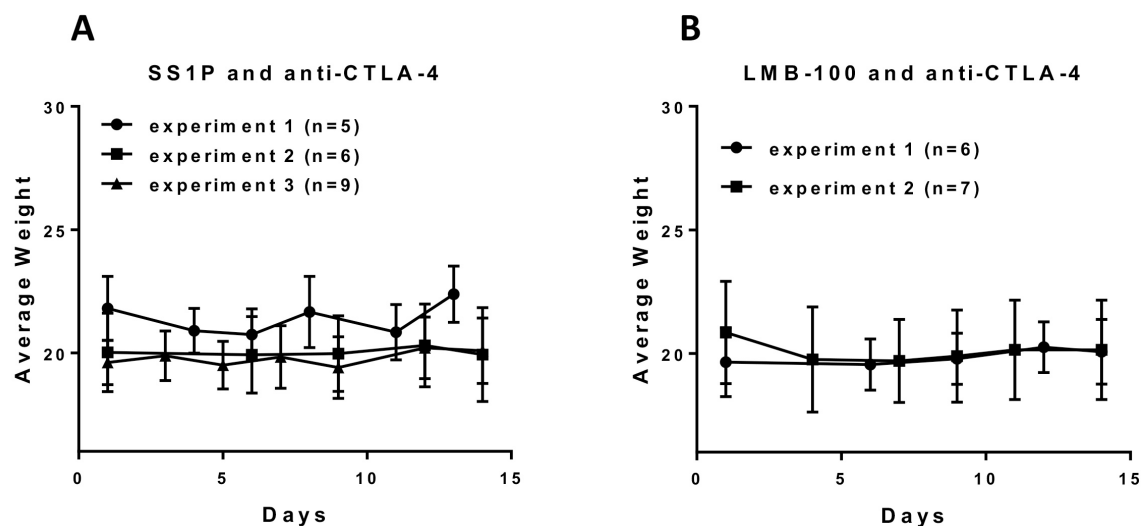

**Combination of intra-tumoral immunotoxins with anti-CTLA-4 is well tolerated by the mice.** Shown are average body weights measured over the course of treatment with 25 $\mu$ g/dose anti-CTLA-4 and (A) 5 $\mu$ g /dose SS1P or (B) 30 $\mu$ g /dose LMB-100

## Supplementary figure S4

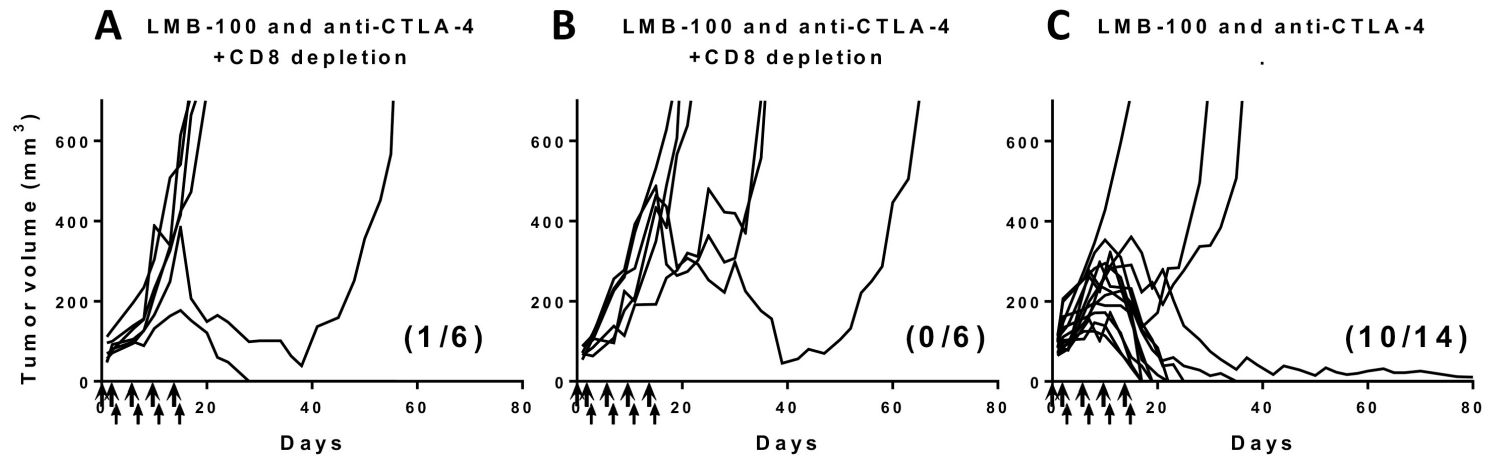

**Anti-tumor effect of anti-CTLA-4 and LMB-100 depends on CD8+ cells.** A-B Individual growth curves of 66C14-M tumors treated with anti-CTLA-4 (thin arrows), LMB-100 (thick arrows) and (A) 200 µg or (B) 100 µg anti-CD8 antibodies. (C) shows pooled data from two experiments. The number of mice in complete remission and the total mice per group is shown in parentheses.

**Supplementary figure S5**

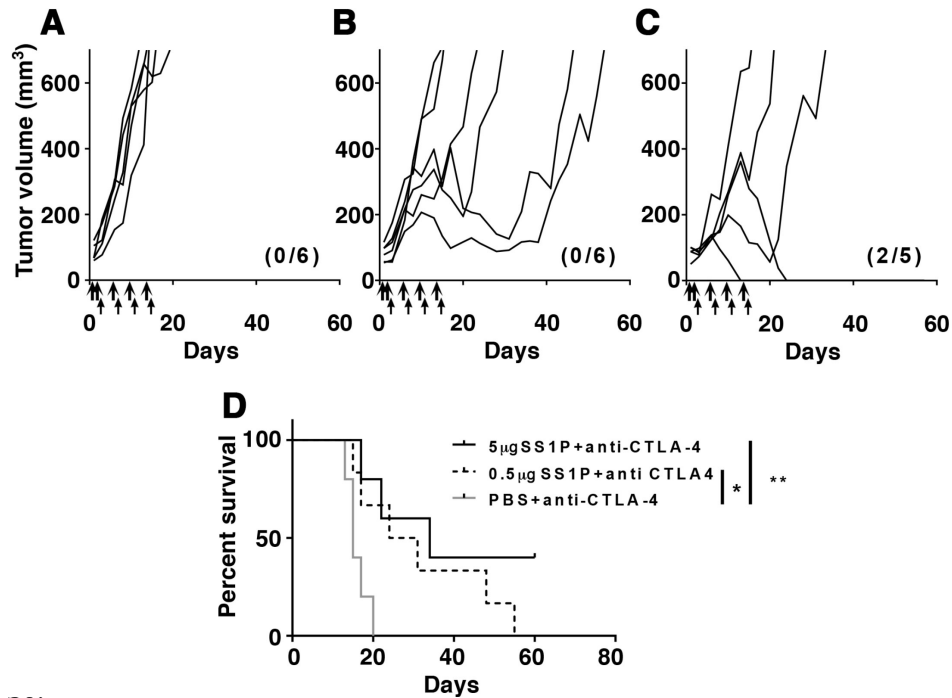

**High dose of SS1P is needed for induction of complete remission.** **A-B.** Individual growth curves of 66C14-M tumors treated with **(A)** anti-CTLA-4 (thin arrows) and PBS (thick arrows), **(B)** anti-CTLA-4 (thin arrows) and 0.5 μg SS1P (thick arrows) or **(C)** anti-CTLA-4 (thin arrows) and 5 μg SS1P (thick arrows). **(D)** Survival of mice described in **(A-C)**. \* P<0.05, \*\* P<0.01.

## Supplementary figure S6A

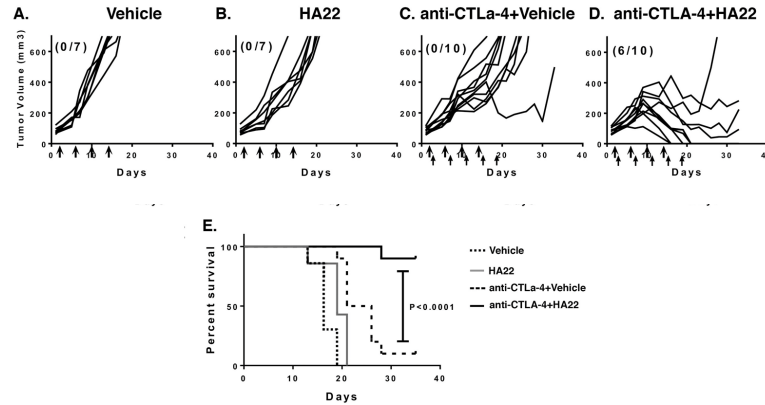

**Anti-tumor effect of an immunotoxin targeting human CD22.** Individual growth curves of 66C14-M tumors treated with (A) vehicle alone (thick arrows), (B) 10  $\mu$ g HA22 alone (thick arrows), (C) vehicle and anti-CTLA-4 (thin arrows) or (D) 10  $\mu$ g HA22 and anti-CTLA-4. (E). Survival of mice described in (A-D). The number of mice in CR and total mice per group is shown in parentheses.

## S6B

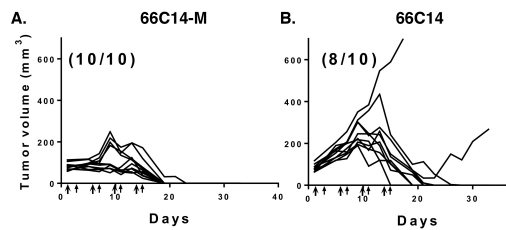

**Combination of SS1P with anti-CTLA-4 lead to tumor regression of 66C14 tumors not expressing MSLN.** Individual growth curves of (A) 66C14-M tumors or (B) 66C14 parental tumors treated identically with SS1P (10  $\mu$ g, thick arrows) and anti-CTLA-4 (thin arrows). The number of mice in CR and total mice per group is shown in parentheses. The graph shows a representative experiment out of two done.

## Supplementary figure S7

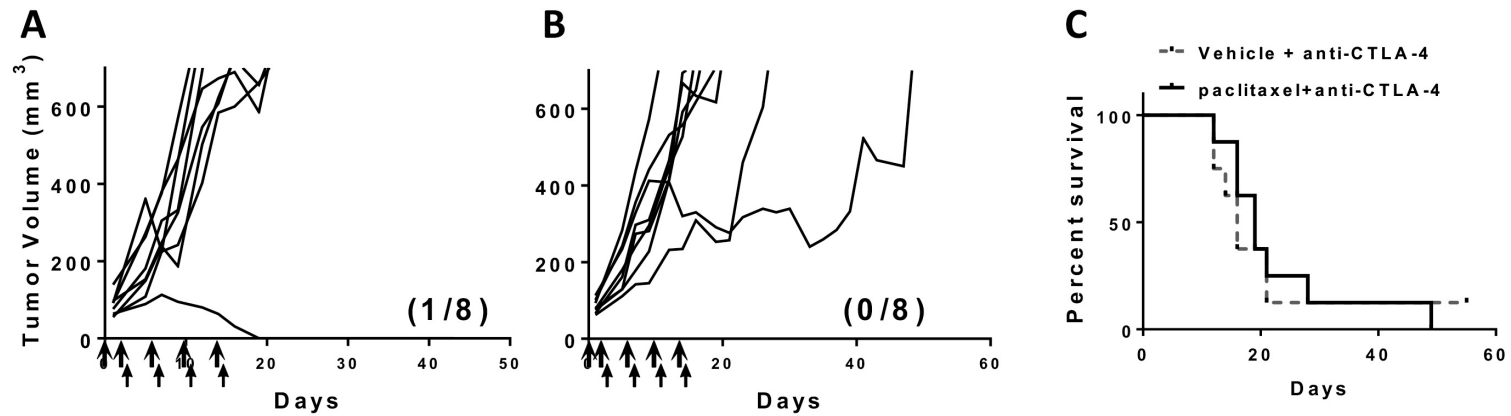

**Intra-tumors injection of paclitaxel does not improve the anti-tumor activity of anti-CTLA-4.** Individual growth curves of 66C14-M tumors treated with 25  $\mu\text{g}$  anti-CTLA-4 (thin arrows) and (A) vehicle (thick arrows) or (B) 30  $\mu\text{g}$  paclitaxel (thick arrows). (C). Survival of mice described in (A-B). The graph shows a representative experiment out of two done.



**Table S1**

Combination of RIT and anti-CTLA-4 induces long-term anti-tumor immunity

| Treatment group                            | 66C14<br>Rejected/Challenged | 66C14-M<br>Rejected/Challenged |
|--------------------------------------------|------------------------------|--------------------------------|
| 100 µg/dose aCTLA-4 and SS1P               | 4/5                          | 6/6                            |
| 50 µg/dose aCTLA-4 and SS1P                | 5/5                          |                                |
| 25 µg/dose CTLA-4 and SS1P                 | 14/15                        |                                |
| 25 µg/dose aCTLA-4 and LMB-100             | 8/8                          |                                |
| 25 µg/dose aCTLA-4 and LMB-2               | 5/5                          |                                |
| % mice rejecting the second cell challenge | 98%                          | 100%                           |

**Combination of RIT and anti-CTLA-4 induces long term anti-tumor immunity.** Mice that reached complete remission after RIT and anti-CTLA-4 treatment received an injection with tumor cells 45 days after complete remission using either  $1 \times 10^6$  66C14-M cells or  $1 \times 10^6$  66C14 parental cells. The number of mice that were challenged and the number of mice rejecting the new cells are indicated.
